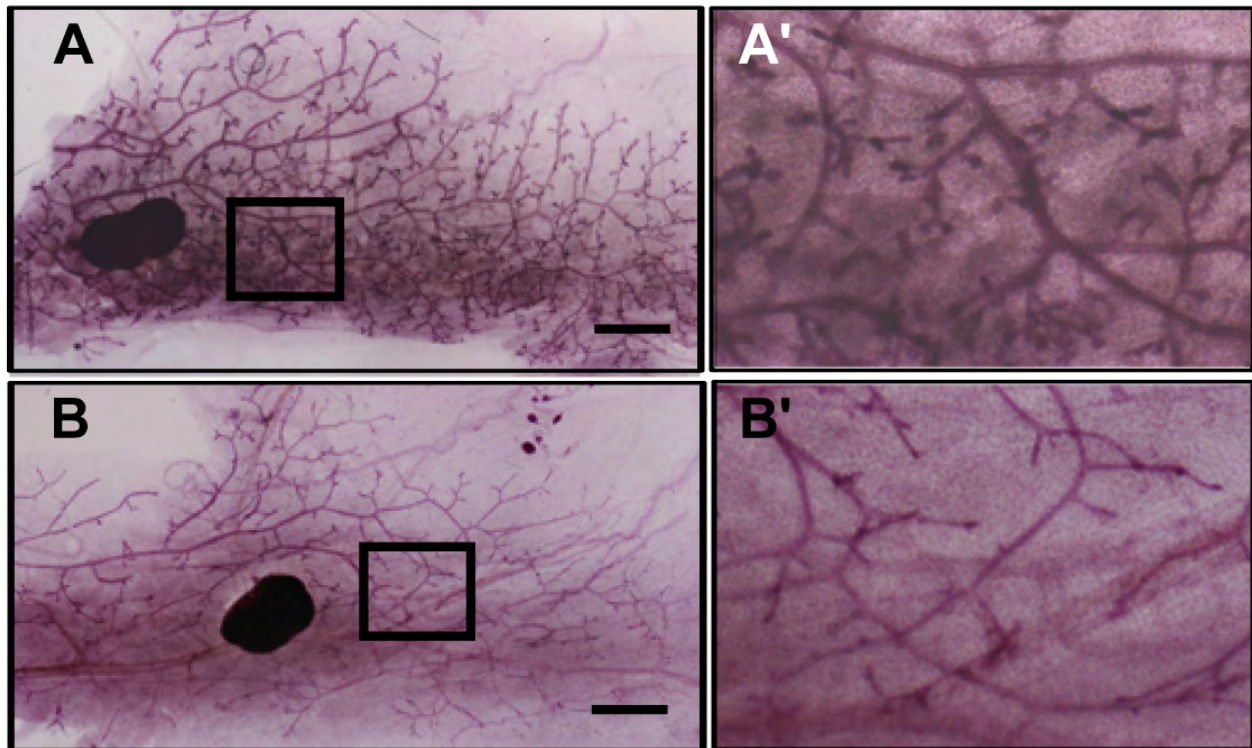

**Fig. S1. Ductal network in 5-month-old RIP140 KO mice.** (A-B') Mammary gland whole-mounts from representative RIP140 heterozygous (RIP140 Het) (A) and RIP140 KO (B) mice. RIP140 KO mice show a sparse ductal tree compared with the extensive ductal network seen in the RIP140 Het. A' and B' show magnified images of the boxed areas in A and B, respectively ( $n=2$ ). Scale bars: 1 mm.

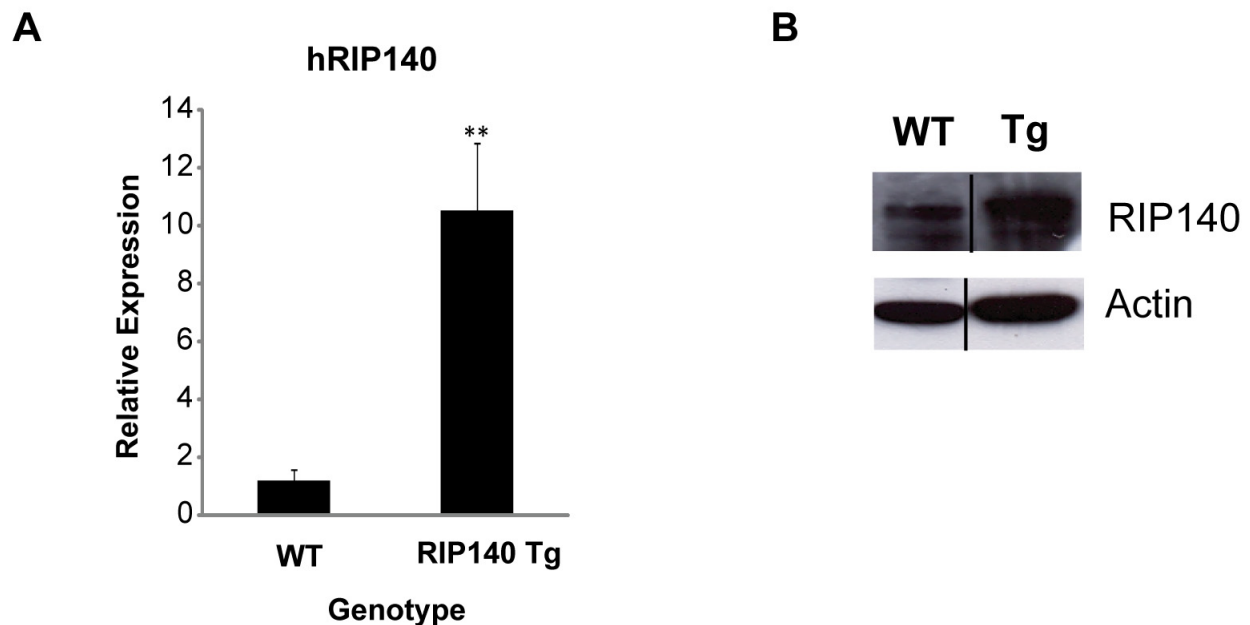

**Fig. S2. Analysis of RIP140 over expressing transgenic mammary glands.** (A) Q-PCR analysis shows over expressed human RIP140 (hRIP140) in the mammary glands from RIP140 transgenic mice. (B) Western blots using RIP140 (1:1000; 6D7, in-house monoclonal) and  $\beta$ -actin (1:5000; Abcam, Cambridge, MA) primary antibodies, show increased RIP140 expression in the mammary glands of the RIP140 transgenic mice ( $n=3$ ). Error bars represent s.e.m. \*\* $P<0.005$ .

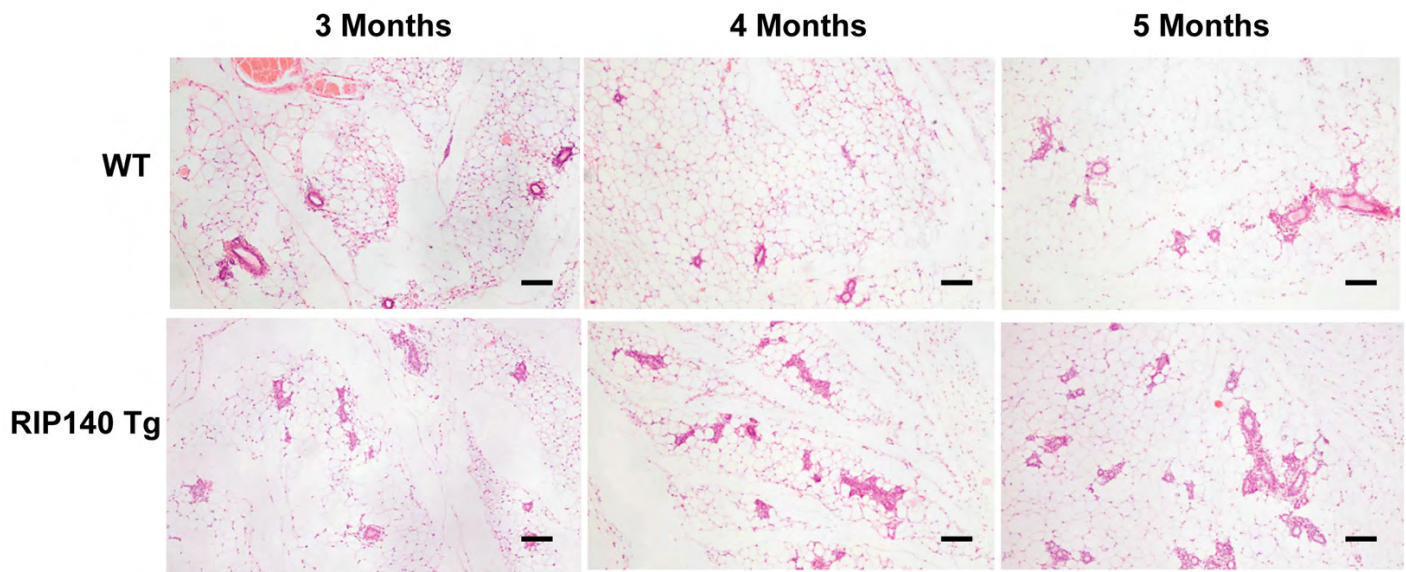

**Fig. S3. Mammary gland histology.** H&E-stained cross-sections through the mammary glands of 3-, 4- and 5-month-old WT and RIP140 Tg mice showing increased hyper budding in RIP140 Tg mice ( $n=3$ ). Scale bars: 200  $\mu\text{m}$ .

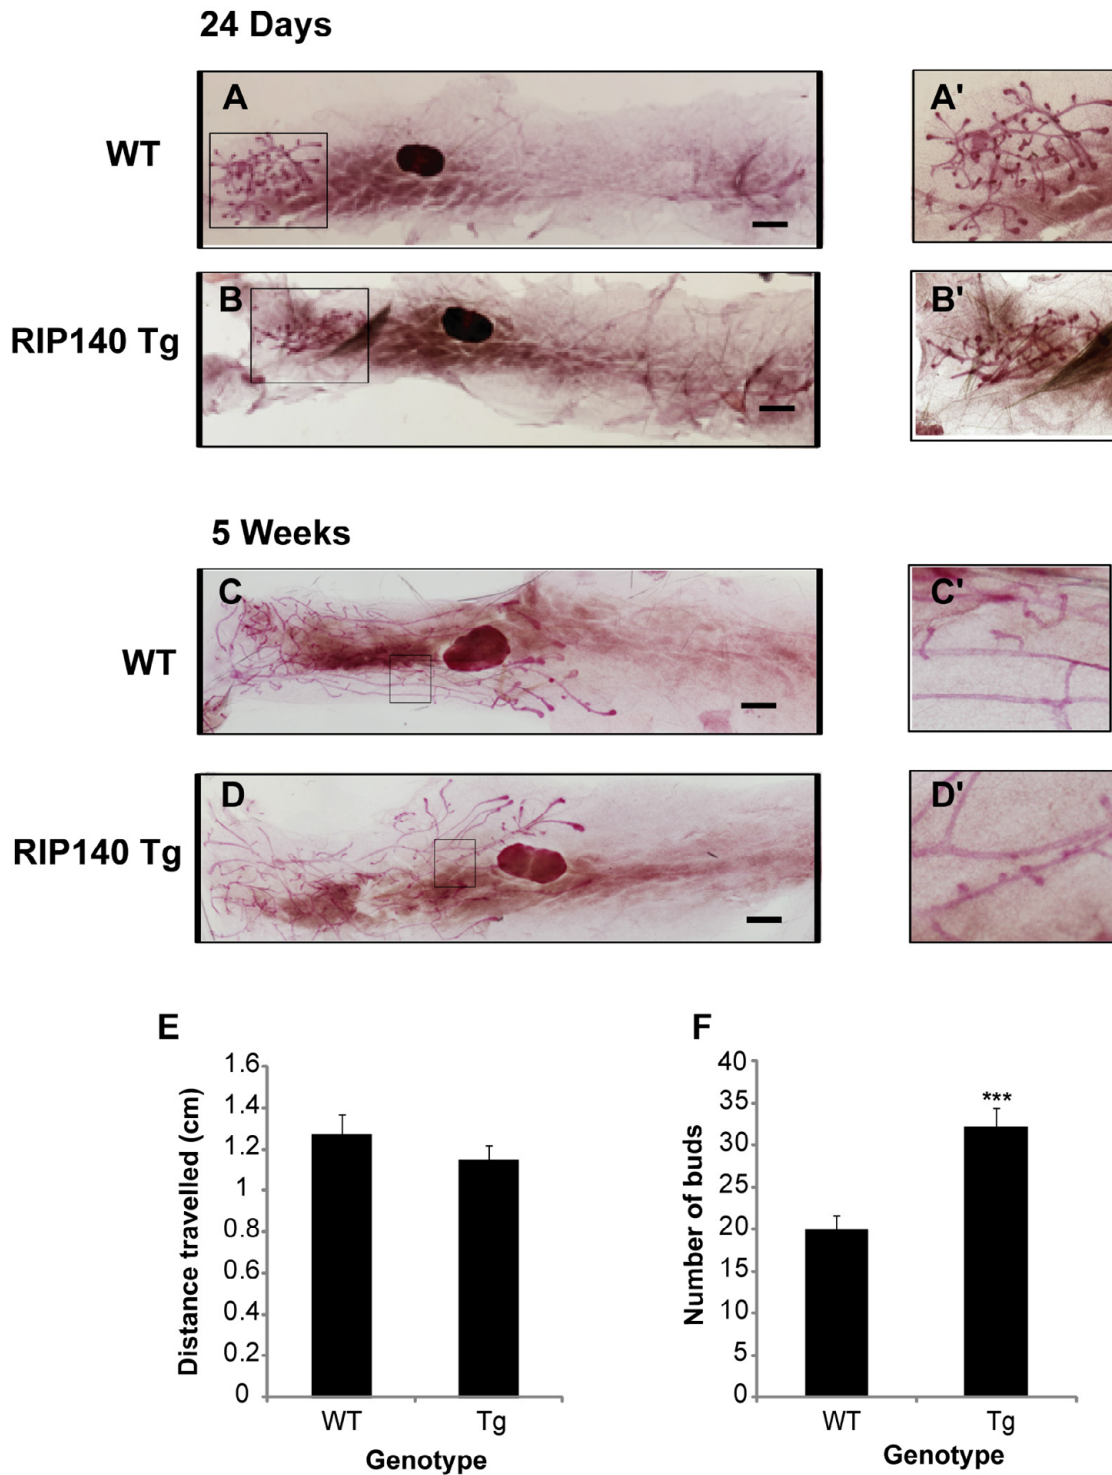

**Fig. S4. RIP140 Tg mammary gland development.** (A-D') Whole-mounts of 24-day-old WT (A) and RIP140 Tg (B), and 5-week-old WT (C) and RIP140 Tg (D) mice. A', B', C' and D' are magnified images of the boxed areas in A, B, C and D, respectively. (E) Distance travelled by the ductal network from the root of the epithelium to the tip of the terminal end buds in 5-week-old WT and RIP140 Tg mice. (F) Quantification of budding points in 5-week-old WT and RIP140 Tg mice ( $n=5$ ).\*\*\* $P<0.0001$ . Error bars represent s.e.m. Scale bars: 1 mm.

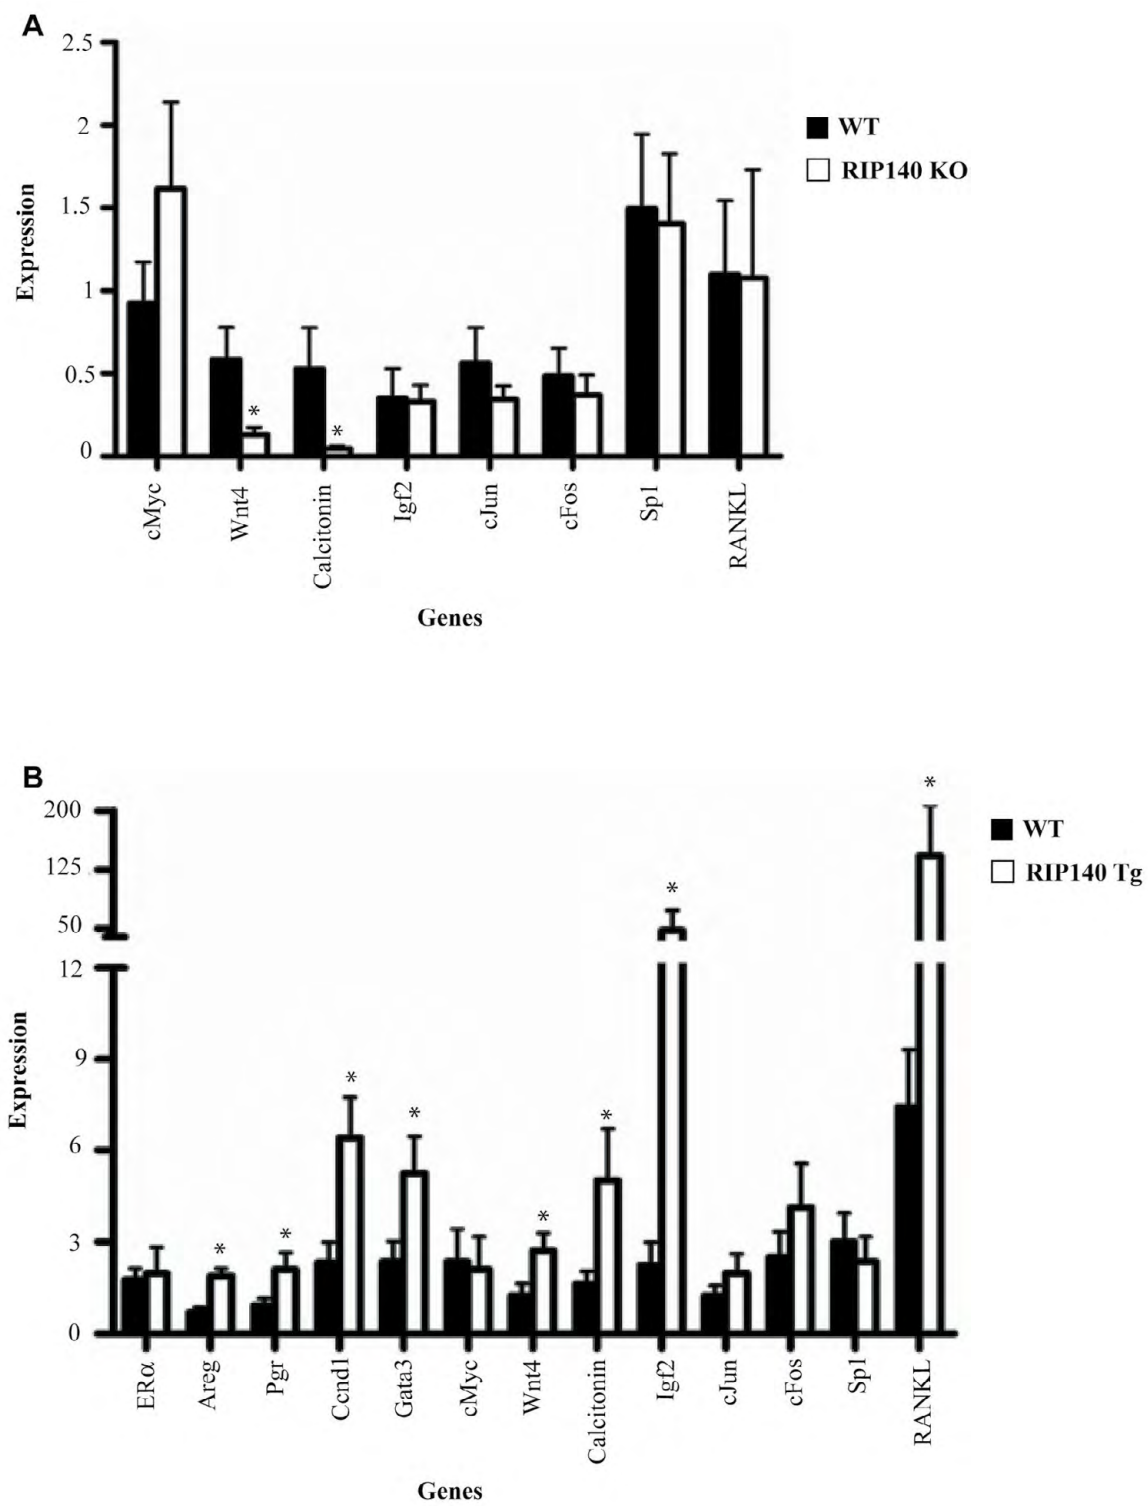

**Fig. S5. Mammary gland gene expression.** Quantitative RT-PCR analysis of gene expression in mammary glands of WT/RIP140 KO (A) and WT/RIP140 Tg (B) mice ( $n=4$ ).  $*P<0.05$ . Error bars represent s.e.m.



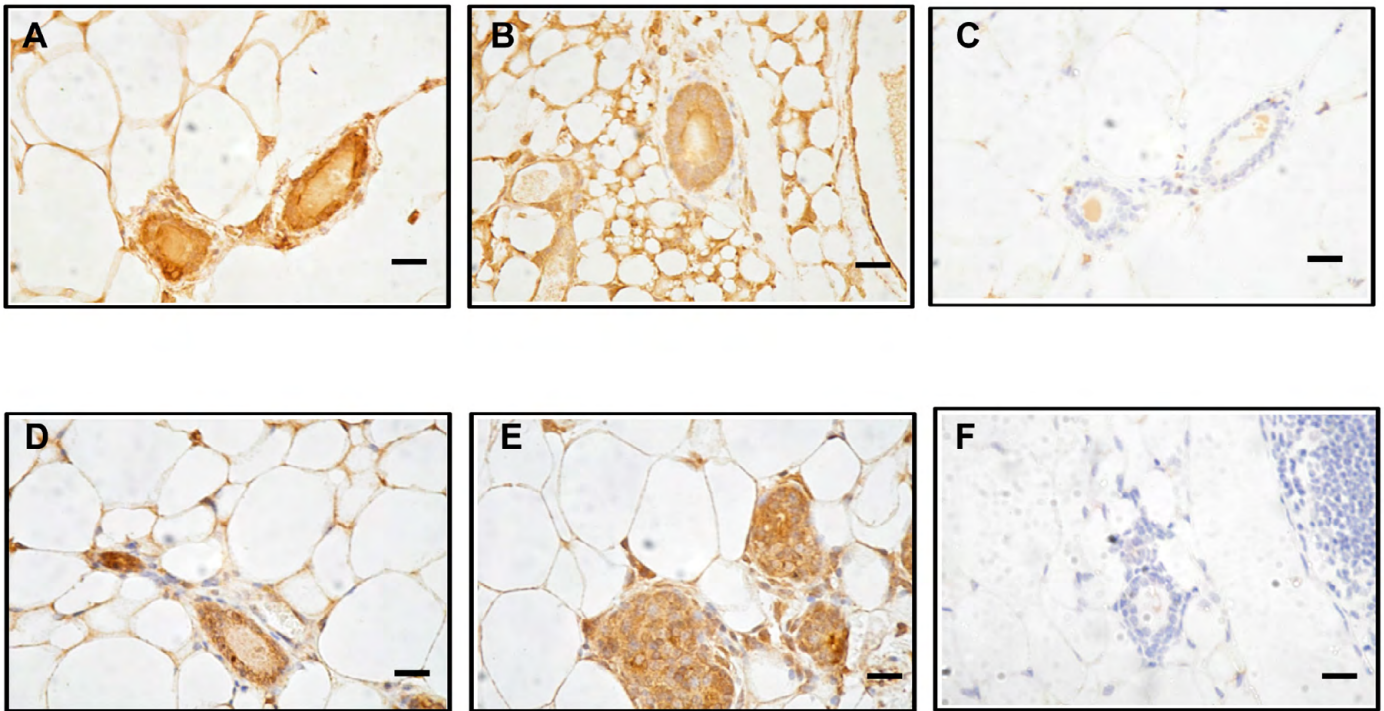

**Fig. S6. Immunocytochemical analysis of RANKL expression in adult (virgin) mice.** (A-C) RANKL staining (brown) in WT (C57BL/6) (A) and RIP140 KO (B) and the no primary antibody control (C). (D-F) RANKL staining in WT (FVB/N) (D) and RIP140 Tg (E) and the no primary antibody control (F). ( $n=3$ ). Scale bars: 50  $\mu\text{m}$ .

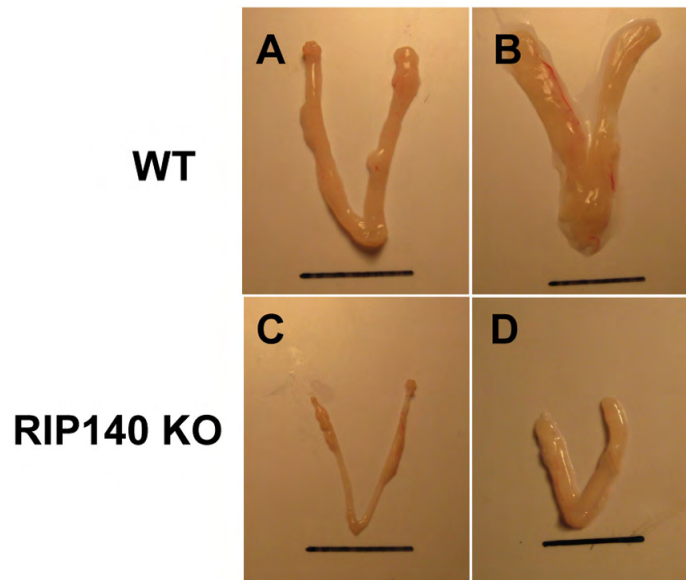

**Fig. S7. Efficacy of estradiol treatment in vivo.** (A-D) Uteri from WT (A,B) and RIP140 KO (C,D) mice treated with 21-day slow release oestradiol (B,D) or placebo (A,C) pellets. Mice treated with oestradiol pellets showed heavier uteri with water retention ( $n=3$ ).

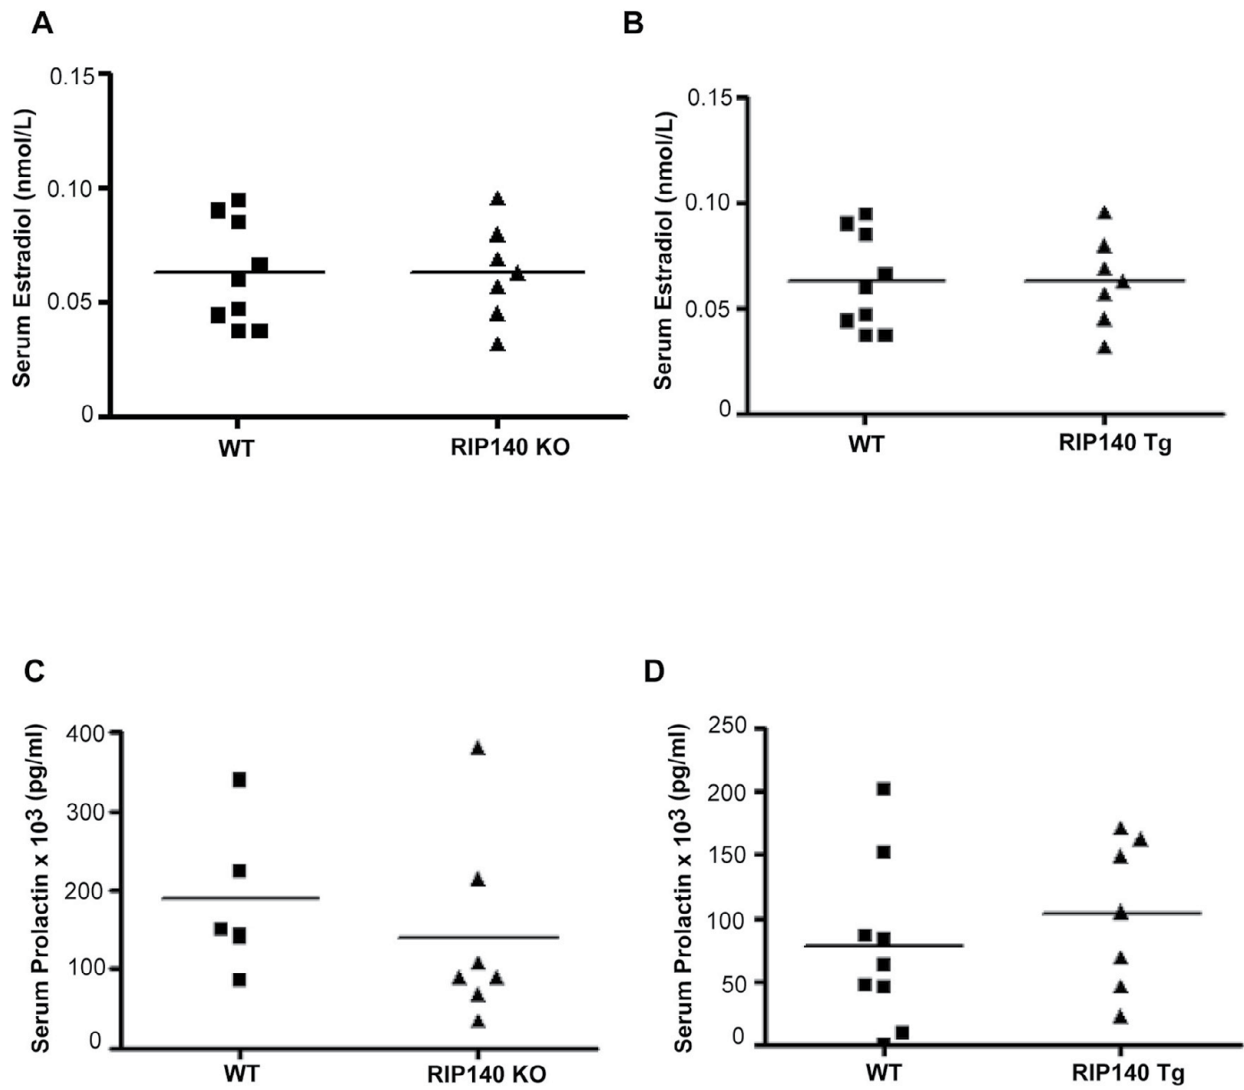

**Fig. S8. Hormone measurements.** (A-D) Serum estradiol (A,B) and prolactin (C,D) concentration in individual 8- to 12-week-old virgin WT/RIP140 KO (C57BL/6) (A,C) and WT/RIP140 Tg (FVB/N) (B,D) mice. Horizontal line represents the mean value.

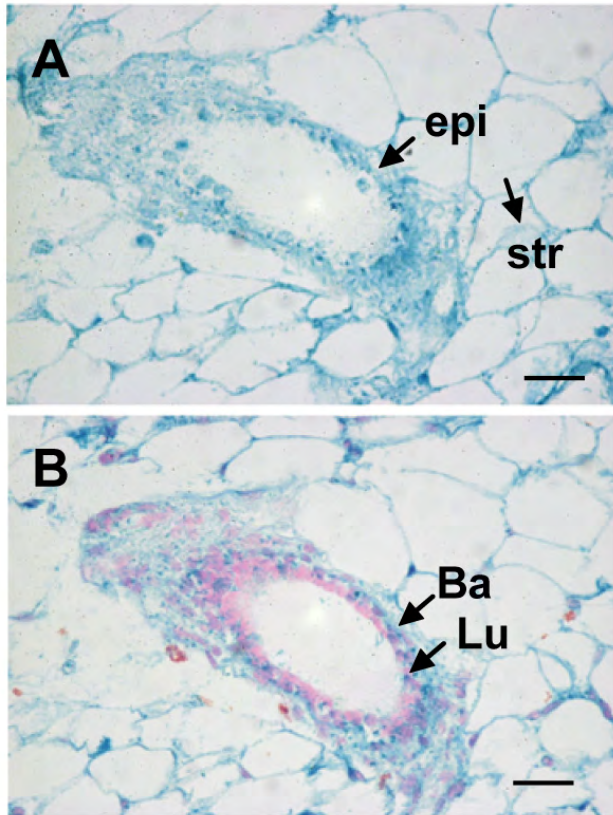

**Fig. S9. Mammary gland sections from RIP140 KO mice stained for  $\beta$ -galactosidase activity.** (A,B) Blue staining depicts RIP140 expression both in the epithelium (epi) and stroma (str) (A). Staining with nuclear fast red (a counterstain) helps highlight RIP140 expression in both the luminal (Lu) and the basal (Ba) layers of the epithelium (B). Scale bars: 50  $\mu$ m.

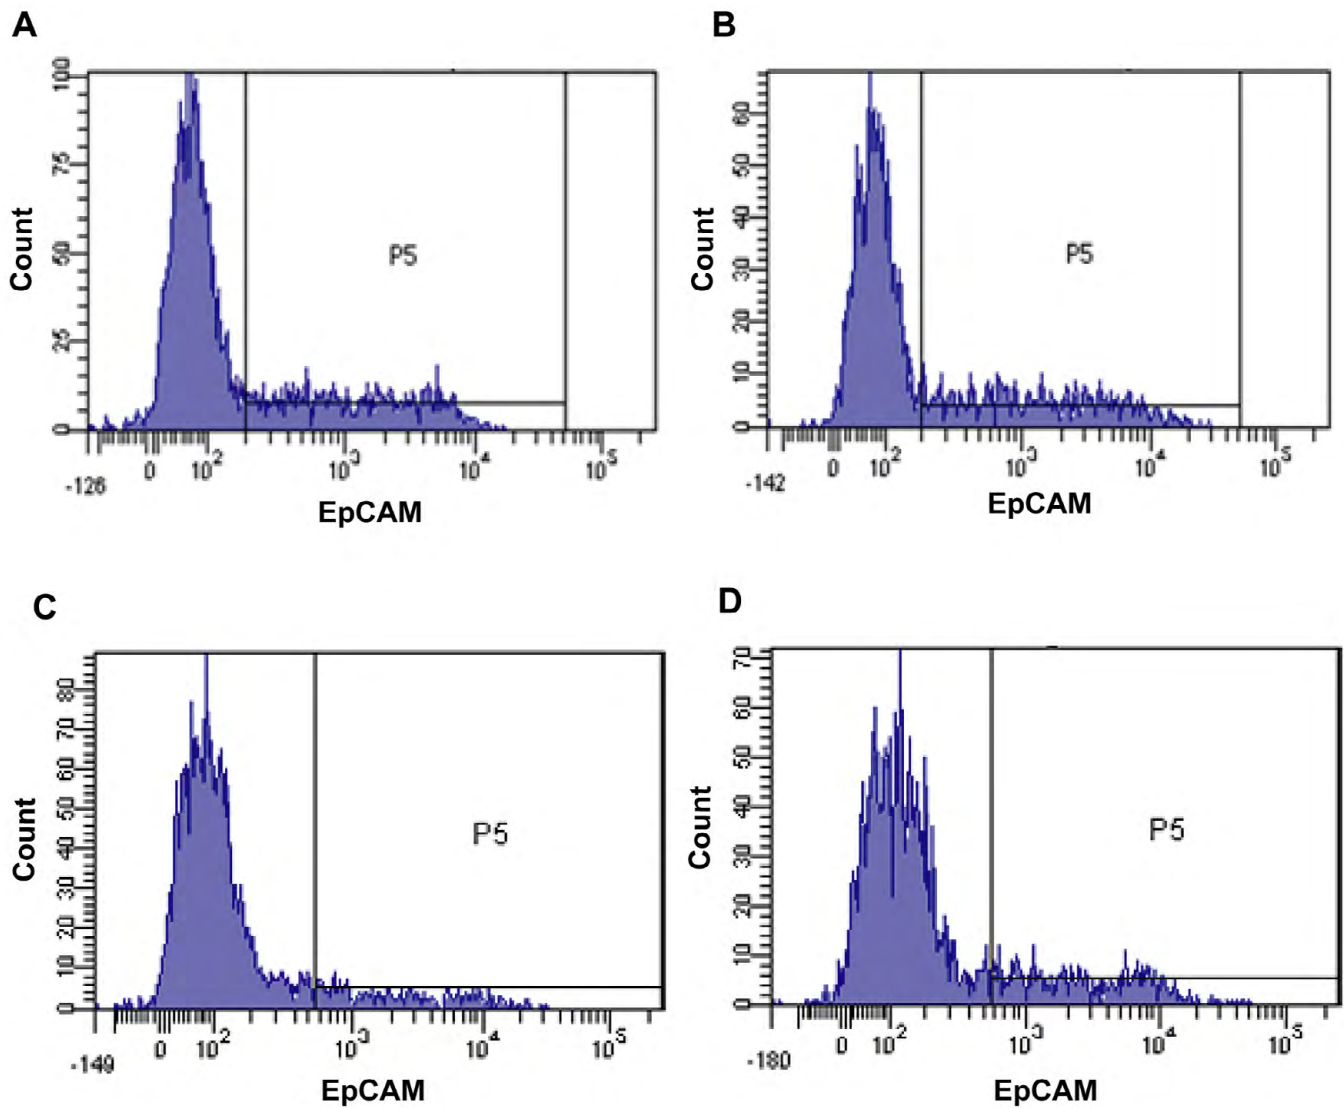

**Fig. S10. Purification of epithelial (EpCAM<sup>+</sup>) cells from single cell suspensions of mouse mammary cells.** Histograms show EpCAM-expressing cells (P5) in total mammary cell preparations isolated from WT (C57BL/6) (A), RIP140 KO (B), WT (FVB/N) (C) and RIP140 Tg (D) mice. These purified epithelial cells were sorted and injected as donor cells in the tissue recombinant experiments.



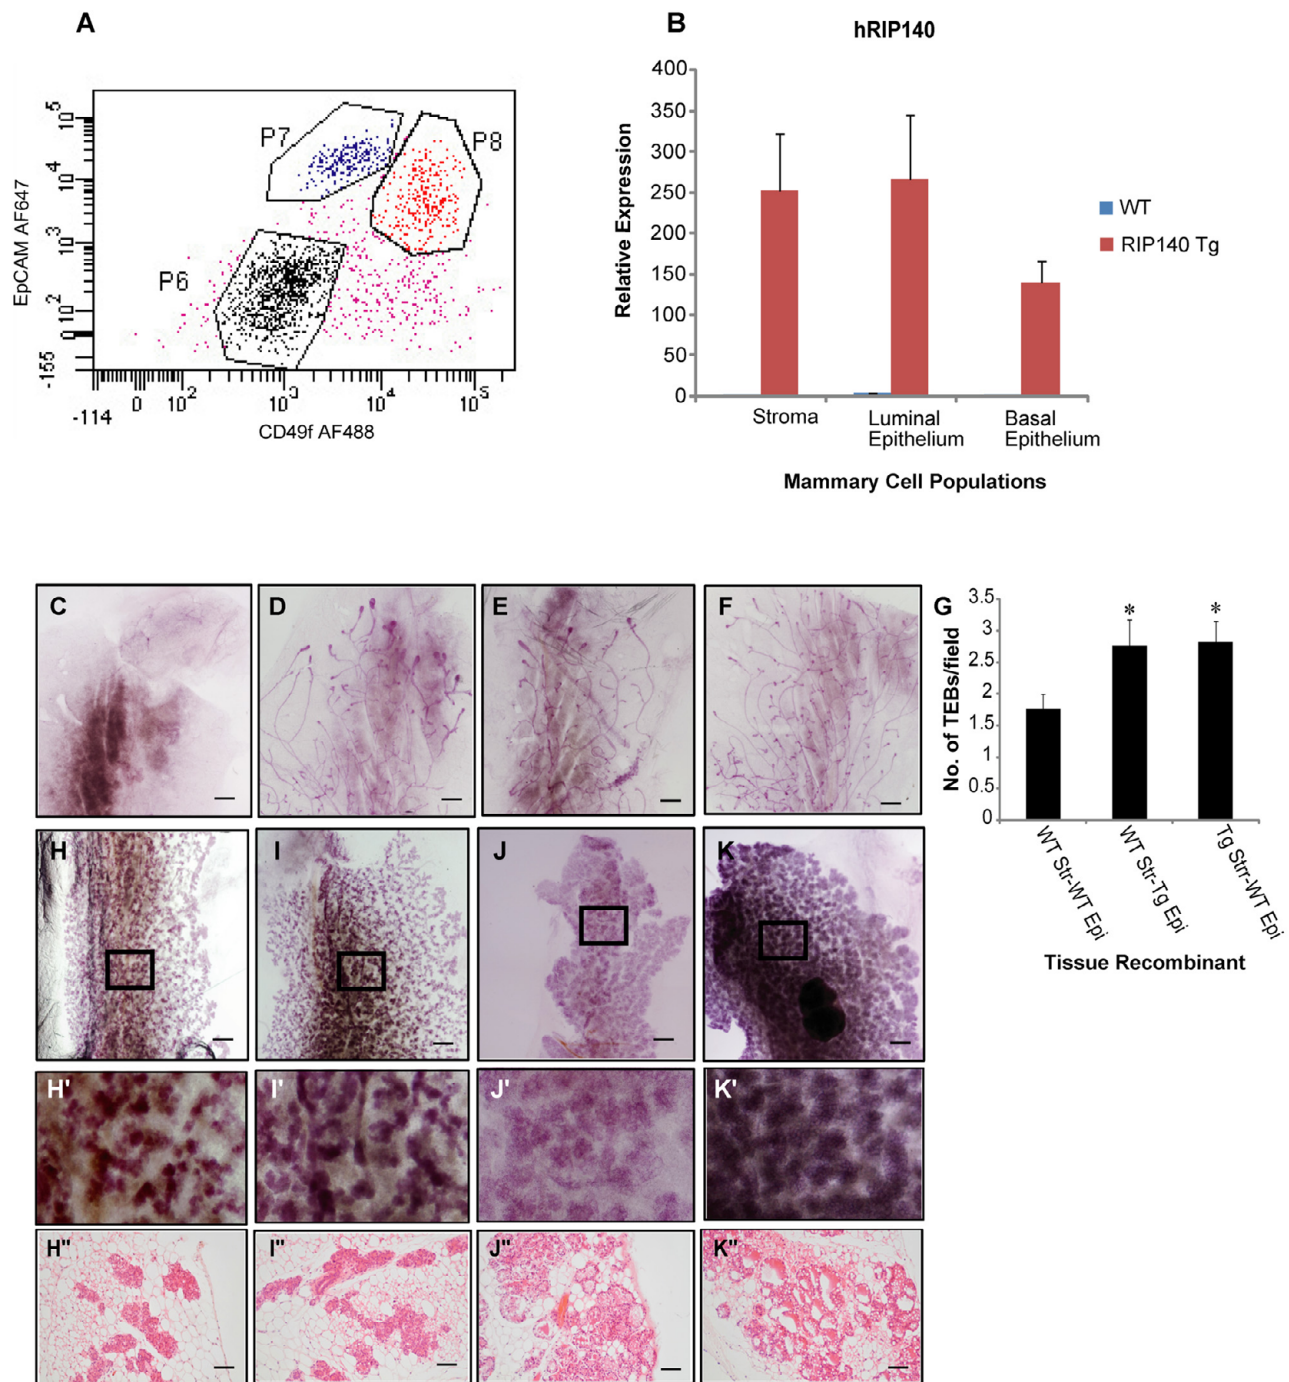

**Fig. S11. Tissue recombination experiments.** (A) Sorting strategy for mammary cell populations for gene expression analysis. Cell population in black (P6) represents stromal, in blue (P7) luminal and in red (P8) basal cells. (B) Q-PCR for RIP140 over expression (hRIP140) in mammary cell populations ( $n=4$ ). (C-F) Tissue recombinants for pubertal growth in the mammary gland. (C) Representative image of a fat pad cleared of endogenous epithelium but not injected with donor epithelial cells. (D,E) Fat pads cleared of endogenous epithelium from 3-week-old WT mice, which were either injected with epithelium from WT (D) or RIP140 Tg (E) donors. (F) Three-week-old RIP140 Tg mice injected with epithelium from WT donors after removal of endogenous epithelium. Images represent recipient fat pads after 6 weeks of donor epithelium injections. (G) Quantification of number of TEBS in D-F. (H-J) Tissue recombinants at day 15 of pregnancy. (H,I) Fat pads from WT mice injected with epithelium from WT (H) or RIP140 Tg (I) donor mice. (J) Fat pad from RIP140 Tg mice injected with epithelium from WT donor. (K) Representative whole-mount of an intact RIP140 Tg mouse at day 15 of pregnancy ( $n=3$ ).  $*P < 0.05$ . (H',I',J',K') Magnified images of boxed area in from H,I,J,K, respectively. (H'',I'',J'',K'') Cross-sections through H,I,J,K, respectively. Error bars represent s.e.m. Scale bars: 1 mm in C-F,H-K; 100  $\mu$ m in H'',I'',J'',K''.

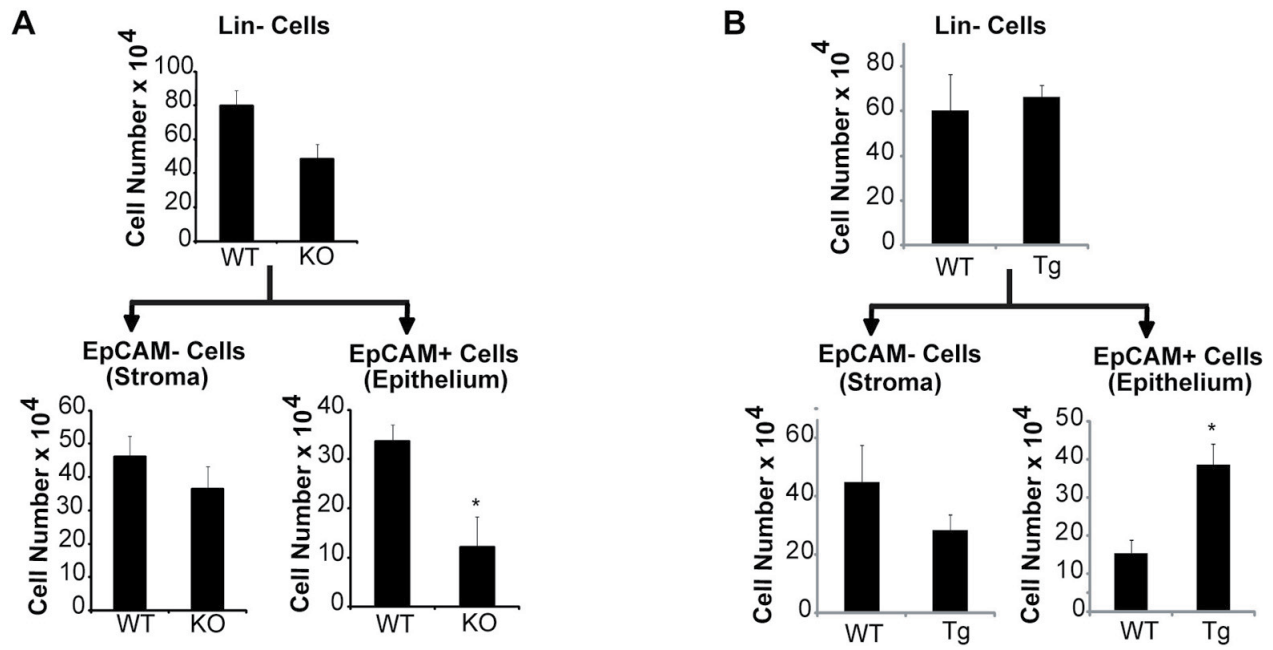

**Fig. S12. Mammary gland cell populations.** Histograms representing number of cells in different cell populations obtained from single cell suspensions of WT/RIP140 KO (A) and WT/RIP140 Tg (B) mammary glands. \* $P < 0.05$ . Error bars represent s.e.m.

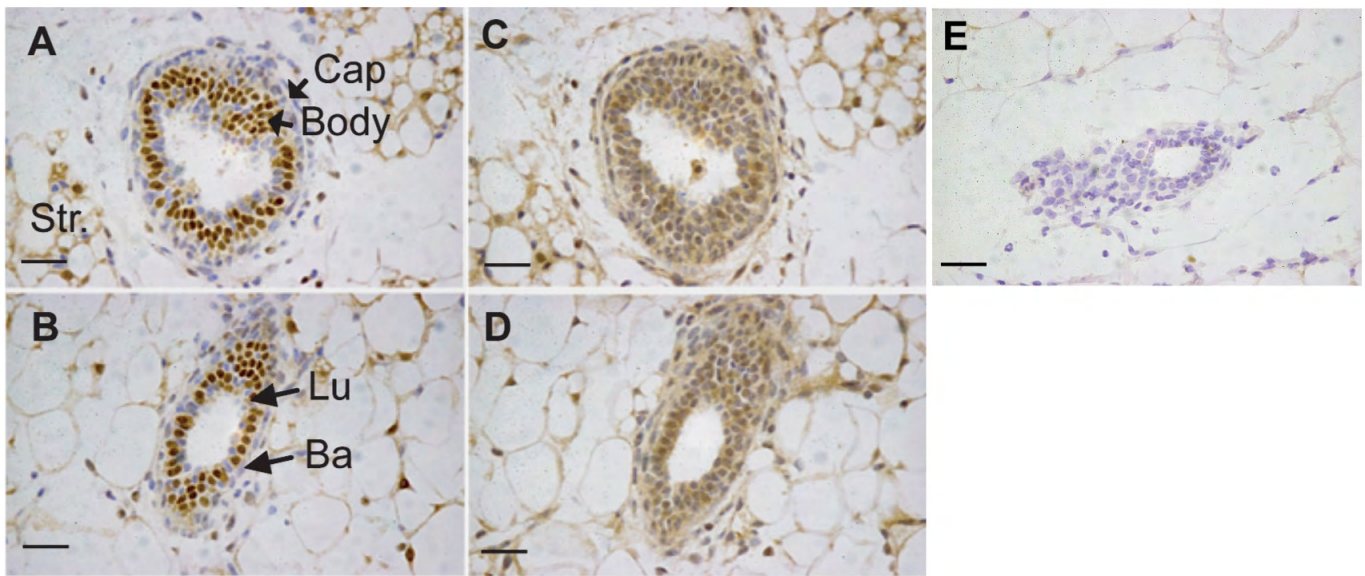

**Fig. S13. ER $\alpha$  and RIP140 co-localization analysis.** (A-D) Immunocytochemical expression (brown) of ER $\alpha$  (A,B) and RIP140 (C,D) in mammary gland sections showing expression in the terminal end buds (A,C), epithelial ducts (B,D) and stroma (Str). Sections are counterstained with Haematoxylin to highlight nuclei. In the TEBs, ER $\alpha$  expression is absent in the cap cells, which are positive for RIP140. In the mature ducts, RIP140 is expressed both in the luminal (Lu) and basal (Ba) layers. (E) RIP140 KO mammary gland section stained with RIP140 antibody. Scale bars: 50  $\mu$ m.

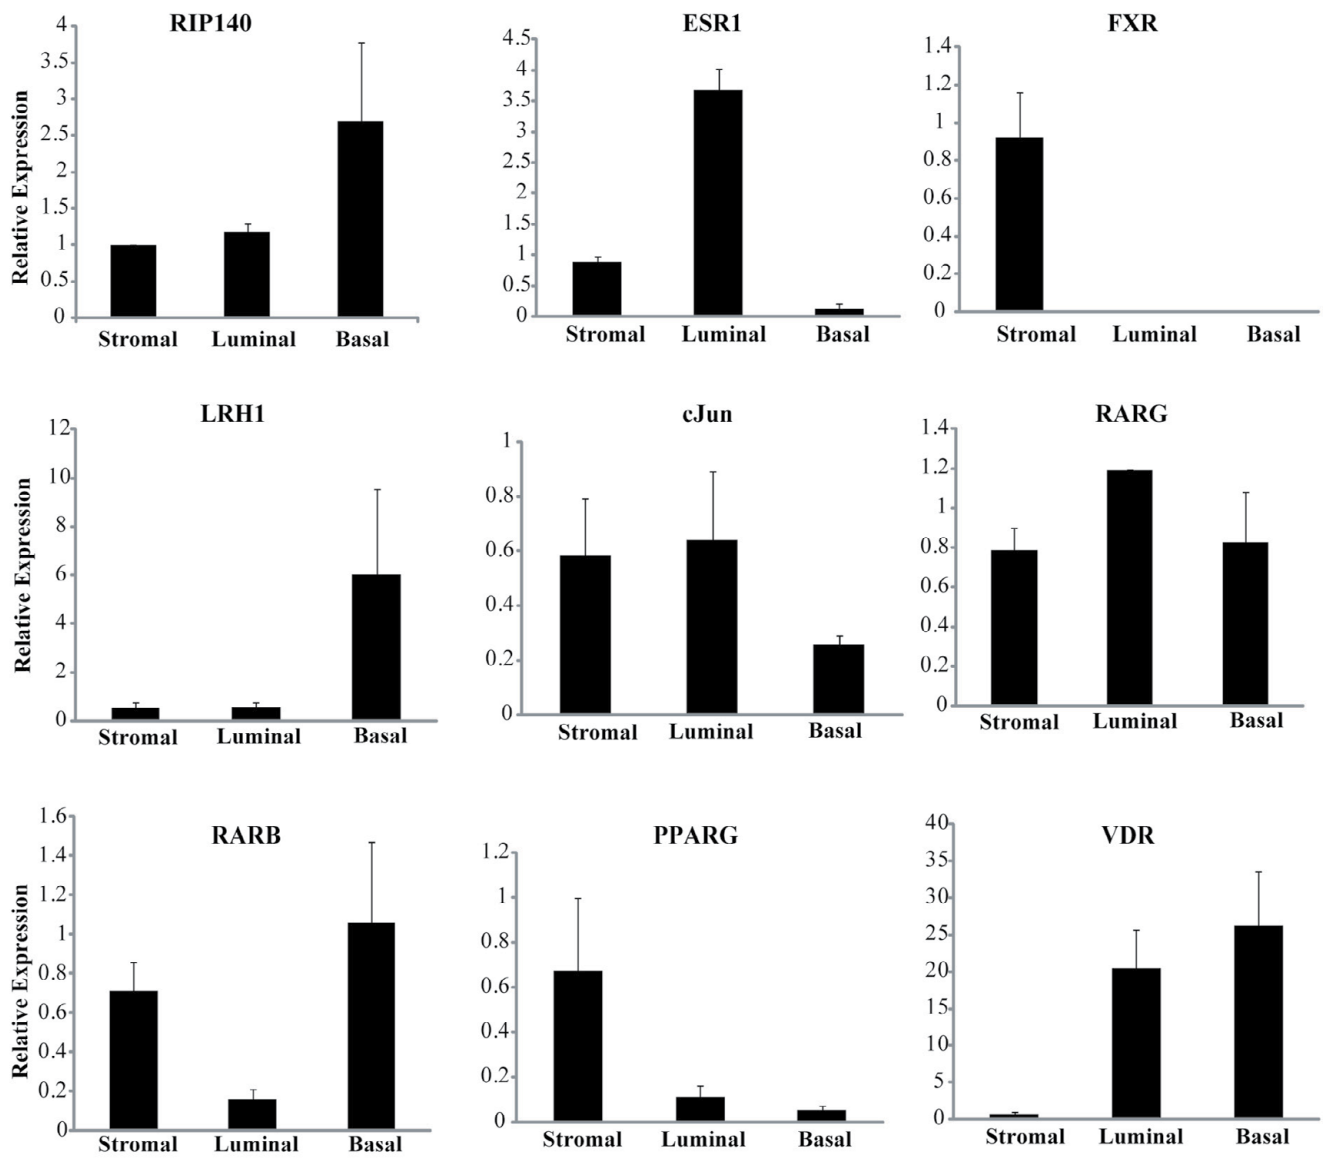

**Fig. S14. Q-PCR analysis of gene expression for RIP140 and several nuclear receptors and transcription factors in sorted mammary cell populations from adult virgin WT mice. Error bars represent s.e.m.**



**Table S1. Sequences for Q-PCR and ChIP primers.**

| <b>Q-PCR primer name</b> | <b>Primer sequences (5'-3')</b>                            |
|--------------------------|------------------------------------------------------------|
| ER $\alpha$              | F:CCTCCCCGCTTCTACAGGT R:CACACGGCACAGTAGCGAG                |
| Areg                     | F: TCCGGCTATATTATAGATGATTCAGTCA R:TCTCCTTCTGTCTTGTTTTCTTGG |
| Pgr                      | F:GGTGGAGGTCGTACAAGCAT R:GGATTGCCACATGGTAAGG               |
| Ccnd1                    | F:CAGAAGTGCGAAGAGGAGGTC R:TCATCTTAGAGGCCACGAACAT           |
| Gata3                    | F:AGTCGAGGCCCAAGGCACGA R:GCTGCCGACAGCCTTCGCTT              |
| RIP140                   | F:CCCCAGTACCAACAGGACTACC R:TGAACGTGGCGGAATTTTGT            |
| Stat5a                   | F:CGCCAGATGCAAGTGTGTAT R:TCCTGGGGATTATCCAAGTCAAT           |
| Lifr                     | F:TACGTCCGACACTCGATATT R:TGGGCGTATCTCTCTCCTT               |
| Cav1                     | F:GCGACCCCAAGCATCTCAA R:ATGCCGTCGAAACTGTGTGT               |
| Rpl7                     | F: AGCGAGGCTACGGCAAAA R:GAGACCGAGCAATCAAGGAATT             |
| hRIP140                  | F:GAGAAACCAGCCCAAAATGA R:CTGGGTCTCTGCTCTTCCAC              |
| emyc                     | F:TCTCCATCCTATGTTGCGGTC R:TCCAAGTAACTCGGTCATCATCT          |
| Wnt4                     | F:AGGAGTGCCAATACCAGTTCC R:TGTGAGAAGGCTACGCCATA             |
| Calcitonin               | F:GCCTTTGAGGTCAATCTTGGA R:GCTTCAACCCCAATTGAAGTTT           |
| Igf2                     | F:GTGCGGAGGGGAGCTTGTGAC R:GTGGGCGTCTTGGGTGGTA              |
| c Jun                    | F: CGGACCGTTCTATGACTGCAA R:GGAGGAACGAGGCGTTGA              |
| c Fos                    | F:CCTGCCCTTCTCAACGAC R:GCTCCACGTTGCTGATGCT                 |
| sp1                      | F:GCCTCAGCTGCCTCCATTC R:CCTGGCATGGAGGAGAGTTG               |
| RANKL                    | F:TGTACTTTTCGAGCGCAGATG R:CCCACAATGTGTTGCAGTTC             |
| FXR                      | F:CACGAAGATCAGATTGCTTTC R:CTCCGCCGAACGAAGAAA               |
| LRH1                     | F:TGCATGCCAAAAGAGCCTAAG R:TCCTCCTTCTCCTTCCAGTCT            |
| RARG                     | F:TGACAGCGAGACTGGGCTACT R:ACCTTCTCGGGCTCTTCCA              |
| RARB                     | F:ACCCAGCAAGCCTCACATGT R:AATTACAGTTCCGGCACCTTTC            |
| PPARG                    | F:CCCCTGCTCCAGGAGATCTAC R:TGCAATCAATAGAAGGAACACGTT         |
| VDR                      | F:ACAGGACGCTAAGCTGGTTGA R:GGCGGCAGCGGATGT                  |

| <b>ChIP Primer Name</b> | <b>Primer sequences (5'-3')</b>                  |
|-------------------------|--------------------------------------------------|
| rip140 prom             | F:GTCTCCCTTTCTCCGTTTC R:TGCACTCCTCAGGTCTCCTT     |
| areg Prom               | F:CCGGTGGAAACCAATGAGAACT R:TGAGCCTAAGACCAGCAGCAA |
| areg Enh                | F:ACAGTGACCCAGACGCTTTT R:ACACATGTCCACAAGGTCA     |
| pgr Prom                | F:GGGTGGGGCTGGCATGCTTC R:CCGCCAAAGCCCCTCCCTA     |
| pgr Enh                 | F:GTTGACAGCATTCCAAAGCA R:TTCGCCATGAGTCGTAAGAA    |
| ccnd1 Prom              | F:CACCCAGTGCGCCAGGATG R:TCCGAGTACGCCACGAGGCA     |
| gata3 Prom              | F:GGGAAGTTGCGGCTGGGTCC R:TTCGCCTAGCTCGGGGTGCT    |
| gata3 Enh               | F:GAGATGGGAGAGGACACAGC R:CAGTTGGAGCTGTCTGGTGA    |
| stat5a                  | F:GTTCAAATGGCCAGGAAAAA R:GGTCACACTGACCTGGTCCT    |
| ccdc6                   | F:GTCACCTGTCCCTCTGGGTA R:CTGTGGTTCAAGCGAAAACA    |
| myc enh                 | F:GCTTAGCCATTCCTGCAGTC R:GCCAAAGGTCATGGTGTCT     |
| cued6                   | F:TGCTTCTGCCAGTTCTACCC R:GCTCTCTCTGCATGGCTTTC    |
| lifr                    | F:GAAGCCAGGAGGTCAGTACTGAG R:ATAGCAGTTTCCAGCCCAGA |
| greb1                   | F:CTCTGGCTGCCTAGGTGACT R:GAAGATCCACCGCAAACCTGT   |
| tprg                    | F:CTCGAGATGTTGATGCCAGA R:CACTTCCACCCACAACCTCT    |
| mef2a                   | F:CTGGCTCTCTCCAACACTC R:TCAGGGACTCTGCTCCTGAT     |
| cav1                    | F:CCCTGGGCTAACAGAACTCA R:CAGCTCGAGTCCAGGATTC     |
| vegfa                   | F:AGACACTTCAGGGAGCAGGA R:TAAAGGGAGGTTTGGCTGTG    |
| b Globin                | F:CCTGCCCTCTCTATCCTGTG R:GCAAATGTGTTGCCAAAAAG    |

F, forward primer; R, reverse primer

**Table S2. List of 458 genes for which ER $\alpha$  binding could be detected within 20 kb of gene promoters.**

| Entrez ID | Gene symbol  | Gene description                                 | ER- progenitor | ER+ progenitor | Differentiated luminal | Basal       | Stromal     |
|-----------|--------------|--------------------------------------------------|----------------|----------------|------------------------|-------------|-------------|
| 2103      | ESRRB        | Estrogen-related receptor beta                   | 5.325514728    | 6.45856139     | 6.606453279            | 5.365730097 | 5.25737677  |
| 2104      | ESRRG        | Estrogen-related receptor gamma                  | 5.254721211    | 5.353738986    | 5.66897559             | 5.18125953  | 5.263388265 |
| 6095      | RORA         | RAR-related orphan receptor A                    | 6.90625365     | 6.242223271    | 6.074482833            | 7.154547644 | 6.861127074 |
| 7421      | VDR          | Vitamin D (1,25-dihydroxyvitamin D3) receptor    | 6.443922757    | 5.753070844    | 5.661924723            | 6.18300242  | 5.136685212 |
| 6097      | RORC         | RAR-related orphan receptor C                    | 6.104929531    | 5.465568827    | 5.719564933            | 5.391660104 | 5.095232079 |
| 5468      | PPARG        | Peroxisome proliferator-activated receptor gamma | 5.319266772    | 5.401434715    | 5.670253622            | 5.512429536 | 6.429797525 |
| 5915      | RARB         | Retenoic acid receptor, beta                     | 5.032788316    | 5.147905268    | 5.145224064            | 5.179409455 | 5.29418781  |
| 5916      | RARG         | Retenoic acid receptor, gamma                    | 5.45835644     | 5.270686782    | 5.650083338            | 5.348901578 | 5.514703504 |
| 3725      | JUN          | Jun oncogene                                     | 7.801161199    | 7.271524941    | 7.241651942            | 7.463239551 | 6.995269918 |
| 2494      | NR5A2 (LRH1) | Nuclear receptor subfamily 5, group A, member 2  | 5.558124566    | 6.156559978    | 5.531169896            | 5.746186332 | 5.452759444 |
| 2099      | ESR1         | Estrogen receptor 1                              | 5.640602984    | 6.888940536    | 6.867860909            | 5.408619722 | 5.713373377 |
| 9971      | NR1H4 (FXR)  | Nuclear receptor subfamily 1, group H, member 4  | 5.101617011    | 5.127743796    | 5.122012353            | 5.146607576 | 5.575165887 |

**Table S3. Data mined from a microarray of gene expression signatures from mouse mammary cell populations, showing differential expression of nuclear receptors and transcription factors, which RIP140 could potentially co-regulate.** Centroids of gene expression for each cell subpopulation were built from the union set of top differentially expressed genes between each pair of cell subtypes. To identify differentially expressed genes, genes were first filtered according to variability and then the limma R package was used to rank them according to differential expression using B-statistics. The False Discovery Rate (FDR) was estimated using the q-value R package. In order to avoid skewing the number of centroid genes to specific cell types, top 250 up- and top 250 downregulated genes were selected in each cell-type comparison. All of these passed FDR corrected  $P$ -values  $<0.05$ . Data taken from Shehata et al. (Shehata et al., 2012).
